1 **Predictive functionality of bacteria in naturally fermented milk products of India using**  
2 **PICRUST2 and Piphillin pipelines**

3

4 H. Nakibapher Jones Shingling and Jyoti Prakash Tamang\*

5

6 DAICENTER (DBT-AIST International Centre for Translational and Environmental  
7 Research) and Bioinformatics Centre, Department of Microbiology, School of Life Sciences,  
8 Sikkim University, Gangtok 737102, Sikkim, India

9

10 \*Corresponding author: Professor Dr. Jyoti Prakash Tamang, Department of Microbiology,  
11 Sikkim University, Tadong 737102, Sikkim, India (e-mail: [jyoti\\_tamang@hotmail.com](mailto:jyoti_tamang@hotmail.com);  
12 Mobile: +91-9832061073)

13

14 **Running Title:** Metagenome gene prediction of fermented milk

15

16     **Abstract**

17     Naturally fermented milk (NFM) products are popular food delicacies in Indian states of  
18     Sikkim and Arunachal Pradesh. Bacterial communities in these NFM products of India were  
19     previously analysed by high-throughput sequence method. However, predictive gene  
20     functionality of NFM products of India has not been studied. In this study, raw sequences of  
21     NFM products of Sikkim and Arunachal Pradesh were accessed from MG-RAST/NCBI  
22     database server. PICRUSt2 and Piphillin tools were applied to study microbial functional  
23     gene prediction. MUSiCC-normalized KOs and mapped KEGG pathways from both  
24     PICRUSt2 and Piphillin resulted in higher percentage of the former in comparison to the  
25     latter. Though, functional features were compared from both the pipelines, however, there  
26     were significant differences between the predictions. Therefore, a consolidated presentation  
27     of both the algorithms presented an overall outlook into the predictive functional profiles  
28     associated with the microbiota of the NFM products of India.

29

30     **Keywords:** Metagenome gene prediction, PICRUSt2, Piphillin, naturally fermented milk  
31     products, lactic acid bacteria

32

33

## 34 **Introduction**

35 Naturally fermented milk (NFM) products are popular food items in daily diets of ethnic  
36 people of Arunachal Pradesh and Sikkim in India, which include *dahi*, *mohi*, *gheu*, soft-  
37 *chhurpi*, hard-*chhurpi*, *dudh-chhurpi*, *chhu*, *somar*, *maa*, *philu*, *shyow*, *mar*, *chhurpi/churapi*,  
38 *churkam* and *churtang/chhurpupu* (Rai et al. 2016; Tamang et al. 2021). Previously,  
39 taxonomic analysis using high-throughput sequencing (HTS) of NFM products of Arunachal  
40 Pradesh and Sikkim viz. *chhurpi*, *churkam mar/gheu* and *dahi*, have been studied  
41 (Shangpliang et al. 2018). We have recorded the abundance of phylum *Firmicutes* with  
42 predominated species of lactic acid bacteria (LAB) viz. *Lactococcus lactis* (19.7%) and  
43 *Lactobacillus helveticus* (9.6%) and *Leuconostoc mesenteroides* (4.5%) and acetic acid  
44 bacteria (AAB): *Acetobacter lovaniensis* (5.8%), *Acetobacter pasteurianus* (5.7%),  
45 *Gluconobacter oxydans* (5.3%), and *Acetobacter syzygii* (4.8%) (Shangpliang et al. 2018).  
46 Application of shotgun metagenomics is one of the commonly used methods for  
47 understanding the microbial-associated gene functional characteristics (Quince et al. 2017).  
48 However, alternately functional profiles of a microbial community can also be inferred  
49 indirectly by marker-gene surveys such as 16S rRNA gene (Ortiz-Estrada et al. 2019;  
50 Bokulich et al. 2020). Bioinformatics pipelines such as Phylogenetic Investigation of  
51 Communities by Reconstruction of Unobserved States version2 (PICRUSt2) (Douglas et al.  
52 2020) and Piphillin (Narayan et al. 2020) among others are some of the well-known tools for  
53 microbial predictive functionality studies from various NGS-related metagenomic data  
54 (Ortiz-Estrada et al. 2019; Bokulich et al. 2020). These pipelines have also been applied in  
55 fermented milk products to infer the functional gene predictions (Zhang et al. 2017; Zhu et al.  
56 2018; Chen et al. 2020; Choi et al. 2020a,b). Microbiota present in NFM products harbour  
57 probiotic properties and impart several health-promoting benefits to consumers (Bengoa et al.  
58 2019; Tamang et al. 2020; García-Burgos et al. 2020). Predictive gene functionality in NFM

59 products of India has not been analysed yet. Hence, the present study is aimed to predict the  
60 microbial functional contents of 16S rRNA gene sequencing data of NFM products of India,  
61 previously analysed by high-throughput sequencing method (Shangpliang et al. 2018), using  
62 PICRUSt2 and Piphillin pipelines.

63

## 64 **Material and Methods**

### 65 **Pre-analysis prior to predictive functionality analysis**

66 Raw sequences of NFM products of Arunachal Pradesh and Sikkim in India analysed by HTS  
67 method (Supplementary Table 1) were accessed from MG-RAST/NCBI database server and  
68 were used in this study. Raw reads were processed using QIIME2-2020.6  
69 (<https://docs.qiime2.org/2020.6/>) (Bolyen et al. 2019). After importing into QIIME2  
70 environment, Q-score based filtering and denoising was performed using Divisive Amplicon  
71 Denoising Algorithm (DADA2) (Callahan et al. 2016) via qiime dada2 denoise-paired  
72 plugin. Quality-filtered sequences were then clustered against SILVA v132 (Quast et al.  
73 2012) databases and followed by taxonomic assignment using q2-vsearch-cluster-features-  
74 closed-reference (Rognes et al. 2016).

75

### 76 **Predictive functionality analysis**

#### 77 ***PICRUSt2 analysis*** (<https://github.com/picrust/picrust2/wiki>)

78 Quality-filtered clustered sequences were feed into PICRUSt2 algorithm (Douglas et al.  
79 2020) using via q2-vsearch-cluster-features-closed-reference (Rognes et al. 2016). PICRUSt2  
80 deduced the predictive functionality of the marker genes by using a standard integrated  
81 genomes database. Firstly, multiple assignment of the exact sequence variants (ESVs) was  
82 performed using HMMER (<http://www.hmmerr.org/>). Placements of ESVs in the reference  
83 tree with evolutionary placement-ng (EPA-ng) algorithm (Barbera et al. 2019) and Genesis

84 Applications for Phylogenetic Placement Analyses (GAPPA) omics (Czech and Stamatakis  
85 2019) were applied. Prediction of gene families was run using a default castor R package  
86 (Louca and Doebeli 2018) with the default algorithm run (maximum parsimony) and  
87 metagenome prediction was acquired using metagenome\_pipeline.py (Ye and Doak 2009).

88

89 ***Piphillin analysis*** (<https://piphillin.secondgenome.com/>)

90 Additionally, predictive functionality was also inferred using Piphillin (Narayan et al. 2020),  
91 a web-server analysis pipeline. DADA2-clustered representative sequences (.fasta) and  
92 abundance frequency table (.csv) were used as inputs for the analysis.

93

#### 94 **Statistical analysis and data visualization**

95 Unnormalized Kyoto Encyclopaedia of Genes and Genomes (KEGG) ortholog (KO) profiles  
96 of PICRUST2 and Piphillin predictive were normalized using Metagenomic Universal Single-  
97 Copy Correction (MUSiCC) (Manor and Borenstein 2015). The output features were then  
98 mapped to KEGG database for systematic analysis of gene functions (Kanehisa et al. 2012).  
99 Relative abundance at the category level was plotted as stacked bar-plot using MSEXCEL  
100 v365. Statistical analysis for significant features (pathways) was carried out using STAMP  
101 (Parks et al. 2014). Normalized predictive features were log-transformed and the differences  
102 between PICRUST2 and Piphillin predictive features were calculated using White's non-  
103 parametric with Benjamini-Hochberg FDR (false discovery rate) (Parks et al. 2014). Non-  
104 parametric Spearman's correlation of the bacteria and functionality was analyzed through  
105 Statistical Package for the Social Sciences (SPSS) v20 and the heatmap representation was  
106 plotted using ClustVis (Metsalu and Vilo 2015).

107

#### 108 **Results**

## 109 **Microbial predictive gene functionality**

110 A total of 1109 error-corrected ESVs was obtained from DADA2 analysis and about 268  
111 SILVA-clustered sequences were used for the downstream predictive analysis. A total of  
112 5995 MUSiCC-normalized KOs and 181 mapped KEGG pathways was obtained from  
113 PICRUSt2 analysis. Similarly, a total of 5245 MUSiCC-normalized KOs and 157 mapped  
114 KEGG pathways was obtained from Piphillin analysis. Overall, both PICRUSt2 and Piphillin  
115 pipelines showed a similar pattern (Fig. 1), except in the metabolism category where the  
116 PICRUSt2 was significantly higher in comparison to that predicted by Piphillin pipeline (Fig.  
117 2). Additionally, at the super pathway level, PICRUSt2 prediction showed significantly high  
118 in amino acid metabolism, metabolism of cofactors and vitamins, energy metabolism, and  
119 biosynthesis of other secondary metabolites (Fig. 2). On the other hand, predictive super  
120 pathways which included carbohydrate metabolism, xenobiotics biodegradation and  
121 metabolism, metabolism of other amino acids, lipid metabolism, metabolism of terpenoids  
122 and polyketides, glycan biosynthesis and metabolism, and nucleotide metabolism were  
123 significantly higher through Piphillin prediction (Fig. 2). Significant metabolic-related  
124 pathways inferred by both PICRUSt2 and Piphillin tools were compared showing several  
125 functional features predicted by these two pipelines (Fig. 3).

126

## 127 **Non-parametric correlation of bacteria with predictive functionality**

128 Non-parametric Spearman's correlation analysis resulted in a complex bacterial-functions  
129 interaction. *Lactococcus* showed a significant negative correlation with glycerolipid  
130 metabolism and ubiquinone and other terpenoid-quinone biosynthesis. *Lactobacillus* showed  
131 significant negative correlation with tryptophan metabolism, galactose metabolism, and  
132 lipoic acid metabolism while it was observed to be positively significantly correlated with  
133 sulphur metabolism. On the other hand, valine, leucine and isoleucine degradation, arginine

134 biosynthesis and ubiquinone and other terpenoid-quinone biosynthesis was positively  
135 correlated with *Leuconostoc*, and negatively correlated with galactose metabolism.  
136 Furthermore, a significant negative correlation was observed between *Acetobacter* with  
137 pathways- tryptophan metabolism, valine, leucine and isoleucine biosynthesis, and lipoic acid  
138 metabolism. *Gluconobacter* also showed a significant negative correlation with  
139 phenylalanine metabolism, pentose and glucuronate interconversions, fructose and mannose  
140 metabolism, and nitrogen metabolism. Glycerolipid metabolism and ubiquinone and other  
141 terpenoid-quinone biosynthesis showed significant positive correlation with *Staphylococcus*,  
142 which significantly negatively correlated with propanoate metabolism. *Pseudomonas* showed  
143 significant negative correlation with fructose and mannose metabolism and significant  
144 positive correlation with tyrosine metabolism, valine, leucine and isoleucine degradation,  
145 arginine and proline metabolism, galactose metabolism, ubiquinone and other terpenoid-  
146 quinone biosynthesis and glutathione metabolism. Additionally, a significant positive  
147 correlation was observed between *Acinetobacter* with phenylalanine metabolism,  
148 streptomycin biosynthesis, ascorbate and aldarate metabolism, propanoate metabolism,  
149 nitrogen metabolism, and biosynthesis of ansamycins (Fig. 4).

150

## 151 **Discussion**

152 In this study, microbial predictive gene functional analysis from targeted-16S rRNA gene  
153 was explored using PICRUST2 and Piphillin pipelines. Inference of predictive functionality  
154 using these two said pipelines showed a high metabolism rate, since most of these products  
155 are consortia of many metabolically active microbiota (Shangpliang et al. 2018). These  
156 findings are similar to recent studies reported from fermented dairy products (Zhang et al.  
157 2017; Zhu et al. 2018; Chen et al. 2020; Choi et al, 2020a,b). The association of various  
158 metabolic pathways such as amino acid metabolism, carbohydrate metabolism, energy

159 metabolism, lipid metabolism, metabolism of cofactors and vitamins, and other secondary  
160 metabolites with the bacterial genera indicated an active interaction of bacteria-function  
161 complexity. LAB are predominant microbiota in many ethnic fermented milk products of  
162 India followed by few AAB (Tamang et al. 2000; Dewan and Tamang 2006, 2007;  
163 Shangpliang et al. 2018; Ghosh et al. 2019; Shangpliang and Tamang 2021). Spearman's  
164 correlation of the predominant bacterial genera with the predictive functionality resulted in a  
165 complex microbial-functions interaction in NFM products of Sikkim and Arunachal Pradesh.  
166 Metabolic activity such as amino acid metabolism is important in dairy products as they  
167 contribute in development of flavour (Yvon and Rijnen 2001). Similarly, carbohydrate  
168 metabolism does also play a major role in flavour and aroma development in milk  
169 fermentation (Pan et al. 2014). The abundance of functional pathways related to metabolism  
170 of amino acids, lipid, energy and carbohydrates were earlier reported in fermented milk and  
171 milk products (Zhang et al. 2017; Ramezani et al. 2017; Zhu et al. 2018; Yasir et al. 2020;  
172 Chen et al. 2020). A high correlation of functional properties and LAB have also been  
173 reported in cheeses (Yang et al. 2020), since LAB are the most predominant microorganisms  
174 in fermented milk products (Rezac et al. 2018; Chen et al. 2020). We observed a positive  
175 correlation of *Staphylococcus* with the predictive metabolic features of these NFM products,  
176 and interestingly, *Staphylococcus* is metabolically active in dairy products playing functional  
177 activities such as amino acid metabolism, carbohydrate metabolism, lipid metabolism and  
178 nitrogen metabolism (Leroy et al. 2020). We also observed the presence of significant  
179 correlation of bacteria with cofactors and vitamins metabolism such as ubiquinone and other  
180 terpenoid-quinone biosynthesis and lipoic acid metabolism, which are essential for other  
181 microbial metabolism (Yao et al. 2020). Apart from LAB, AAB have also contributed to  
182 many functional features in NFM products; AAB involve in protein metabolism, production  
183 of secondary metabolites and volatile compounds (Illegghems et al. 2015; Ai et al. 2019).



184 Functional profiles from both PICRUSt2 and Piphillin were normalized using MUSiCC  
185 (Manor and Borenstein 2015), which is a marker gene-based method which use universal  
186 single-copy genes for biasness correction of gene abundances (Noecker et al. 2017).  
187 Normalization using MUSiCC have proven necessary for gene functional studies (Vincent et  
188 al. 2017), rescaling the abundant predicted KOs to the actual average gene copy number,  
189 correcting several known biases (Manor and Borenstein 2017). Piphillin is usually applied in  
190 human clinical samples (Iwai et al. 2016); whereas PICRUSt2 is widely used for  
191 environmental samples (Douglas et al. 2020). However, these pipelines have also been  
192 widely used in dairy products (Choi et al. 2020a,b).

193 From our present analysis, PICRUSt2 analysis generated more predicted KOs and KEGG  
194 pathways in comparison to that of Piphillin. Though, significant differences were observed,  
195 however, there are functions which were predicted only from PICRUSt2 and missing in  
196 Piphillin and vice versa. Therefore, consolidated predictive functions from both these  
197 pipelines are necessary for a comprehensive outlook into the potential of bacteria associated  
198 with NFM products. Though predictive functionality study of the microbiota associated with  
199 NFM products at present is only speculations using bioinformatics tools, a general outlook  
200 into the potentiality of functions may be studied and compared. Nonetheless, in the absence  
201 of shotgun metagenomics data, using PICRUSt2 and Piphillin serves to be the reliable  
202 analysis for microbial predictive gene function.

203

## 204 **Conclusion**

205 Bacterial community in NFM products showed many functional features with many  
206 important health benefits to consumers. We applied PICRUSt2 and Piphillin tools to infer the  
207 predictive functional features of microbiota associated with the ethnic fermented milk

208 products of India. Therefore, such studies may be used for future comparison with detailed  
209 gene functionality studies of other fermented foods elsewhere.

210

### 211 **Acknowledgements**

212 The authors are grateful to the Department of Biotechnology, Govt. of India through the  
213 DAICENTER project. HNJS is grateful to DBT for Junior Research Fellowship.

214

### 215 **Funding**

216 This current research is supported by Department of Biotechnology, Govt. of India through  
217 DBT-AIST International Centre for Translational and Environmental Research  
218 (DAICENTER) project.

219

### 220 **Authors' contributions**

221 HNJS did analysis and bioinformatics analysis. JPT has supervised the bioinformatics  
222 analysis and finalised the manuscript.

223

### 224 **Availability of data and materials**

225 Raw sequences were accessed from MG-RAST server having the MG-RAST ID number  
226 4732361 to 4732414. The same were accessed from NCBI database server under the  
227 BioProject No. PRJNA661385 with accession numbers SAMN16056817 to  
228 SAMN16056870.

229

### 230 **Declaration of Competing Interest**

231 The authors declare that they have no competing interests.

232

233 **References**

- 234 Ai, M., Qiu, X., Huang, J., Wu, C., Jin, Y., & Zhou, R. (2019). Characterizing the microbial  
235 diversity and major metabolites of Sichuan bran vinegar augmented by *Monascus*  
236 *purpureus*. *International Journal of Food Microbiology* 292, 83–90.
- 237 Barbera, P., Kozlov, A.M., Czech, L., Morel, B., Darriba, D., Flouri, T. & Stamatakis, A.  
238 (2019). EPA-ng: massively parallel evolutionary placement of genetic sequences.  
239 *Systematic Biology* 68(2), 365–369.
- 240 Bengoa, A.A., Iraporda, C., Garrote, G.L., & Abraham, A.G. (2019). Kefir micro-organisms:  
241 their role in grain assembly and health properties of fermented milk. *Journal of Applied*  
242 *Microbiology* 126(3), 686–700.
- 243 Bokulich, N.A., Ziemski, M., Robeson, M. & Kaehler, B. (2020). Measuring the microbiome:  
244 best practices for developing and benchmarking microbiomics methods. *Computational*  
245 *and Structural Biotechnology Journal* 18, 4048–4062.
- 246 Bolyen, E., Rideout, J.R., Dillon, M.R., Bokulich, N.A., Abnet, C.C., Al-Ghalith, G.A.,  
247 Alexander, H., Alm, E.J., Arumugam, M. & Asnicar, F. (2019). Reproducible,  
248 interactive, scalable and extensible microbiome data science using QIIME 2. *Nature*  
249 *Biotechnology* 37(8), 852–857.
- 250 Callahan, B.J., McMurdie, P.J., Rosen, M.J., Han, A.W., Johnson, A.J.A. & Holmes, S.P.  
251 (2016). DADA2: high-resolution sample inference from Illumina amplicon data. *Nature*  
252 *Methods* 13(7), 581–583.
- 253 Chen, X., Zheng, R., Liu, R. & Li, L. (2020). Goat milk fermented by lactic acid bacteria  
254 modulates small intestinal microbiota and immune responses. *Journal of Functional*  
255 *Foods* 65, 103744. [https://doi.org/https://doi.org/10.1016/j.jff.2019.103744](https://doi.org/10.1016/j.jff.2019.103744)
- 256 Choi, J., Lee, I., Rackerby, B., Frojen, R., Goddik, L., Ha, S.D. & Park, S.H. (2020a).  
257 Assessment of overall microbial community shift during Cheddar cheese production

- 258 from raw milk to aging. *Applied Microbiology and Biotechnology* 104, 6249–6260.
- 259 Choi, J., Lee, S.I., Rackerby, B., Goddik, L., Frojen, R., Ha, S.D., Kim, J.H. & Park, S.H.  
260 (2020b). Microbial communities of a variety of cheeses and comparison between core  
261 and rind region of cheeses. *Journal of Dairy Science* 103(5), 4026–4042.
- 262 Czech, L. & Stamatakis, A. (2019). Scalable methods for analyzing and visualizing  
263 phylogenetic placement of metagenomic samples. *PloS One* 14(5), e0217050–  
264 e0217050. <https://doi.org/https://doi.org/10.1371/journal.pone.0217050>
- 265 Dewan, S. & Tamang, J.P. (2006). Microbial and analytical characterization of Chhu-A  
266 traditional fermented milk product of the Sikkim Himalayas. *Journal of Scientific and*  
267 *Industrial Research* 65, 747–752.
- 268 Dewan, S. & Tamang, J.P. (2007). Dominant lactic acid bacteria and their technological  
269 properties isolated from the Himalayan ethnic fermented milk products. *Antonie van*  
270 *Leeuwenhoek* 92(3), 343–352.
- 271 Douglas, G.M., Maffei, V.J., Zaneveld, J.R., Yurgel, S.N., Brown, J.R. Taylor, C.M.,  
272 Huttenhower, C., & Langille, M.G.I. (2020). PICRUSt2 for prediction of metagenome  
273 functions. *Nature Biotechnology* 38, 685–688.
- 274 García-Burgos, M., Moreno-Fernández, J., Alférez, M.J.M., Díaz-Castro, J. & López-Aliaga,  
275 I. (2020). New perspectives in fermented dairy products and their health relevance.  
276 *Journal of Functional Foods* 72, 104059.  
277 <https://doi.org/https://doi.org/10.1016/j.jff.2020.104059>
- 278 Ghosh, T., Beniwal, A., Semwal, A. & Navani, N.K. (2019). Mechanistic insights into  
279 probiotic properties of lactic acid bacteria associated with ethnic fermented dairy  
280 products. *Frontiers in Microbiology* 10, 502.  
281 <https://doi.org/https://doi.org/10.3389/fmicb.2019.00502>
- 282 Illegghems, K., Weckx, S. & De Vuyst, L. (2015). Applying meta-pathway analyses through

- 283 metagenomics to identify the functional properties of the major bacterial communities of  
284 a single spontaneous cocoa bean fermentation process sample. *Food Microbiology* 50,  
285 54–63.
- 286 Iwai, S., Weinmaier, T., Schmidt, B.L., Albertson, D.G., Poloso, N.J., Dabbagh, K. &  
287 DeSantis, T.Z. (2016). Piphillin: improved prediction of metagenomic content by direct  
288 inference from human microbiomes. *PloS One* 11(11), e0166104.  
289 <https://doi.org/https://doi.org/10.1371/journal.pone.0166104>
- 290 Kanehisa, M., Goto, S., Sato, Y., Furumichi, M. & Tanabe, M. (2012). KEGG for integration  
291 and interpretation of large-scale molecular data sets. *Nucleic Acids Research* 40(D1),  
292 D109–D114.
- 293 Leroy, S., Even, S., Micheau, P., de La Foye, A., Laroute, V., Le Loir, Y. & Talon, R.  
294 (2020). Transcriptomic analysis of *Staphylococcus xylosus* in solid dairy matrix reveals  
295 an aerobic lifestyle adapted to rind. *Microorganisms* 8(11), 1807.  
296 <https://doi.org/https://doi.org/10.3390/microorganisms8111807>
- 297 Louca, S. & Doebeli, M. (2018). Efficient comparative phylogenetics on large trees.  
298 *Bioinformatics* 34(6), 1053–1055.
- 299 Manor, O. & Borenstein, E. (2015). MUSiCC: a marker genes based framework for  
300 metagenomic normalization and accurate profiling of gene abundances in the  
301 microbiome. *Genome Biology* 16(1), 53.  
302 <https://doi.org/https://doi.org/10.1093/nar/gkr988>
- 303 Manor, O. & Borenstein, E. (2017). Systematic characterization and analysis of the  
304 taxonomic drivers of functional shifts in the human microbiome. *Cell Host & Microbe*  
305 21(2), 254–267.
- 306 Metsalu, T. & Vilo, J. (2015). ClustVis: a web tool for visualizing clustering of multivariate  
307 data using Principal Component Analysis and heatmap. *Nucleic Acids Research* 43(W1),

- 308 W566–W570.
- 309 Narayan, N.R., Weinmaier, T., Laserna-Mendieta, E.J., Claesson, M.J., Shanahan, F.,  
310 Dabbagh, K., Iwai, S. & DeSantis, T.Z. (2020). Piphillin predicts metagenomic  
311 composition and dynamics from DADA2-corrected 16S rDNA sequences. *BMC*  
312 *Genomics* 21(1), 1–12. [https://doi.org/https://doi.org/10.1186/s12864-020-6537-9](https://doi.org/10.1186/s12864-020-6537-9)
- 313 Noecker, C., McNally, C.P., Eng, A. & Borenstein, E. (2017). High-resolution  
314 characterization of the human microbiome. *Translational Research* 179, 7–23.
- 315 Ortiz-Estrada, Á.M., Gollas-Galván, T., Martínez-Córdova, L.R. & Martínez-Porchas, M.  
316 (2019). Predictive functional profiles using metagenomic 16S rRNA data: a novel  
317 approach to understanding the microbial ecology of aquaculture systems. *Reviews in*  
318 *Aquaculture* 11(1), 234–245.
- 319 Pan, D.D., Wu, Z., Peng, T., Zeng, X.Q. & Li, H. (2014). Volatile organic compounds profile  
320 during milk fermentation by *Lactobacillus pentosus* and correlations between volatiles  
321 flavor and carbohydrate metabolism. *Journal of Dairy Science* 97(2), 624–631.
- 322 Parks, D.H., Tyson, G.W., Hugenholtz, P. & Beiko, R.G. (2014). STAMP: statistical analysis  
323 of taxonomic and functional profiles. *Bioinformatics* 30(21), 3123–3124.
- 324 Quast, C., Pruesse, E., Yilmaz, P., Gerken, J., Schweer, T., Yarza, P., Peplies, J. & Glöckner,  
325 F. O. (2012). The SILVA ribosomal RNA gene database project: improved data  
326 processing and web-based tools. *Nucleic Acids Research* 41(D1), D590–D596.
- 327 Quince, C., Walker, A., Simpson, J., Loman, N.J., Segata, N. (2017). Shotgun metagenomics,  
328 from sampling to analysis. *Nature Biotechnology* 35, 833–844.
- 329 Rai, R., Shangpliang, H.N.J. & Tamang, J.P. (2016). Naturally fermented milk products of  
330 the Eastern Himalayas. *Journal of Ethnic Foods* 3(4), 270–275.
- 331 Ramezani, M., Hosseini, S.M., Ferrocino, I., Amoozegar, M.A. & Cocolin, L. (2017).  
332 Molecular investigation of bacterial communities during the manufacturing and ripening

- 333 of semi-hard Iranian Liqvan cheese. *Food Microbiology* 66, 64–71.
- 334 Rezac, S., Kok, C.R., Heermann, M. & Hutkins, R. (2018). Fermented foods as a dietary  
335 source of live organisms. *Frontiers in Microbiology* 9, 1785.  
336 <https://doi.org/https://doi.org/10.3389/fmicb.2018.01785>
- 337 Rognes, T., Flouri, T., Nichols, B., Quince, C. & Mahé, F. (2016). VSEARCH: a versatile  
338 open source tool for metagenomics. *PeerJ* 4, e2584.  
339 <https://doi.org/https://doi.org/10.7717/peerj.2584>
- 340 Shangpliang, H.N.J., Rai, R., Keisam, S., Jeyaram, K. & Tamang, J.P. (2018). Bacterial  
341 community in naturally fermented milk products of Arunachal Pradesh and Sikkim of  
342 India analysed by high-throughput amplicon sequencing. *Scientific Reports* 8(1), 1532.  
343 <https://doi.org/https://doi.org/10.1038/s41598-018-19524-6>
- 344 Shangpliang, H.N.K. and Tamang, J.P. (2021). Phenotypic and genotypic characterizations of  
345 lactic acid bacteria isolated from exotic naturally fermented milk (cow and yak)  
346 products of Arunachal Pradesh, India. *International Dairy Journal* 118: 105038.[doi.org/10.1016/j.idairyj.2021.105038](https://doi.org/10.1016/j.idairyj.2021.105038)
- 347 [10.1016/j.idairyj.2021.105038](https://doi.org/10.1016/j.idairyj.2021.105038)
- 348 Tamang, J.P., Cotter, P.D., Endo, A., Han, N.S., Kort, R., Liu, S.Q., Mayo, B., Westerik, N.  
349 & Hutkins, R. (2020). Fermented foods in a global age: East meets West.  
350 *Comprehensive Reviews in Food Science and Food Safety* 19(1), 184–217.
- 351 Tamang, J.P., Dewan, S., Thapa, S., Olasupo, N.A., Schillinger, U., Wijaya, A. & Holzapfel,  
352 W. H. (2000). Identification and enzymatic profiles of the predominant lactic acid  
353 bacteria isolated from soft-variety Chhurpi, a traditional cheese typical of the Sikkim  
354 Himalayas. *Food Biotechnology* 14(1–2), 99–112.
- 355 Tamang, J.P., Jeyaram, K., Rai, A.K. & Mukherjee, P.K. (2021). Diversity of beneficial  
356 microorganisms and their functionalities in community-specific ethnic fermented foods  
357 of the Eastern Himalayas. *Food Research International* 148,

- 358           110633.[doi.org/10.1016/j.foodres.2021.110633](https://doi.org/10.1016/j.foodres.2021.110633).
- 359       Vincent, A.T., Derome, N., Boyle, B., Culley, A.I. & Charette, S.J. (2017). Next-generation  
360           sequencing (NGS) in the microbiological world: How to make the most of your money.  
361           *Journal of Microbiological Methods* 138, 60–71.
- 362       Yang, C., Zhao, F., Hou, Q., Wang, J., Li M. & Sun, Z. (2020). PacBio sequencing reveals  
363           bacterial community diversity in cheeses collected from different regions. *Journal of*  
364           *Dairy Science* 103(2) 1238–1249.
- 365       Yao, Y., Zhou, X., Hadiatullah, H., Zhang, J. & Zhao, G. (2020). Determination of microbial  
366           diversities and aroma characteristics of Beitang shrimp paste. *Food Chemistry* 128695.  
367           <https://doi.org/https://doi.org/10.1016/j.foodchem.2020.128695>
- 368       Yasir, M., Bibi, F., Hashem, A.M. & Azhar, E.I. (2020). Comparative metagenomics and  
369           characterization of antimicrobial resistance genes in pasteurized and homemade  
370           fermented Arabian laban. *Food Research International* 137, 109639.  
371           <https://doi.org/https://doi.org/10.1016/j.foodres.2020.109639>
- 372       Ye, Y. & Doak, T.G. (2009). A parsimony approach to biological pathway  
373           reconstruction/inference for genomes and metagenomes. *PLoS Computational Biology*  
374           5(8). <https://doi.org/https://doi.org/10.1371/journal.pcbi.1000465>
- 375       Yvon, M. & Rijnen, L. (2001). Cheese flavour formation by amino acid catabolism.  
376           *International Dairy Journal* 11(4–7), 185–201. Zhang, F., Wang, Z., Lei, F., Wang, B.,  
377           Jiang, S., Peng, Q., Zhang, J. & Shao, Y. (2017). Bacterial diversity in goat milk from  
378           the Guanzhong area of China. *Journal of Dairy Science* 100(10), 7812–7824.
- 379       Zhu, Y., Cao, Y., Yang, M., Wen, P., Cao, L., Ma, J., Zhang, Z. & Zhang, W. (2018).  
380           Bacterial diversity and community in Qula from the Qinghai–Tibetan plateau in China.  
381           *PeerJ* 6, e6044. <https://doi.org/https://doi.org/10.7717/peerj.6044>

382

383



384 **Legends for Figures:**

385 **Figure 1:** An overall categorical representation of the MUSiCC-normalized predictive  
386 microbial functions as inferred by (a) PICRUSt2 and (b) Piphillin.

387  
388 **Figure 2:** Extended error bar chart representation of the significant predictive functionalities  
389 as inferred by both PICRUSt2 and Piphillin. (a) Overall, metabolism is significantly higher in  
390 PICRUSt2 analysis as compared to that of Piphillin, however, (b) a shared difference was  
391 observed at the super-pathway level. Significance ( $q\text{-value} > 0.05$ ) was calculated using  
392 White's non-parametric test with Benjamini-Hochberg FDR (false discovery rate) in  
393 STAMP.

394  
395 **Figure 3:** An overall comparison of the significant metabolic pathways as inferred by  
396 PICRUSt2 and Piphillin depicting a significant number of functional features predicted by  
397 these two pipelines. Significance ( $q\text{-value} > 0.05$ ) was calculated using White's non-  
398 parametric test with Benjamini-Hochberg FDR (false discovery rate) in STAMP.

399  
400 **Figure 4:** Non-parametric Spearman's correlation of the ASV-associated predominant  
401 bacterial genera of the NFM products with a consolidated functional feature as inferred by  
402 both PICRUSt2 and Piphillin. Here, calculation was carried out using Statistical Package for  
403 the Social Sciences (SPSS) v20 and heatmap was generated using ClustVis. All significant  
404 correlation pairs are denoted by \* ( $* < 0.05$  and  $** < 0.01$ ). LAB-lactic acid bacteria; AAB-  
405 acetic acid bacteria.

406

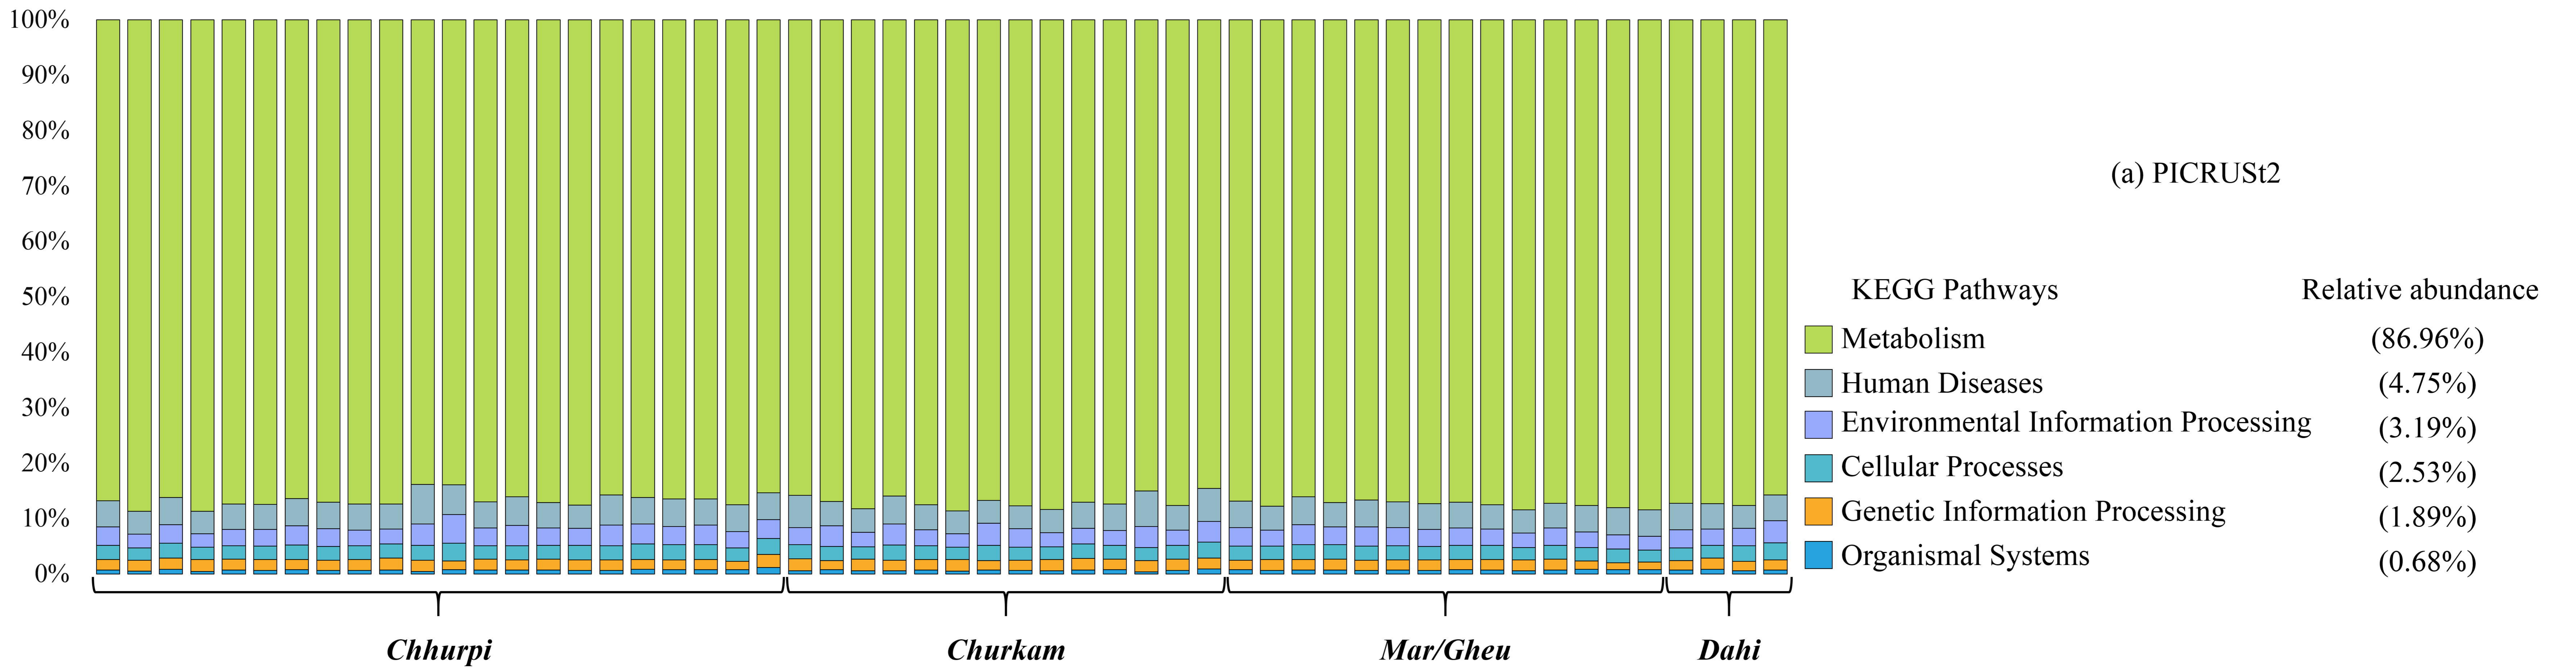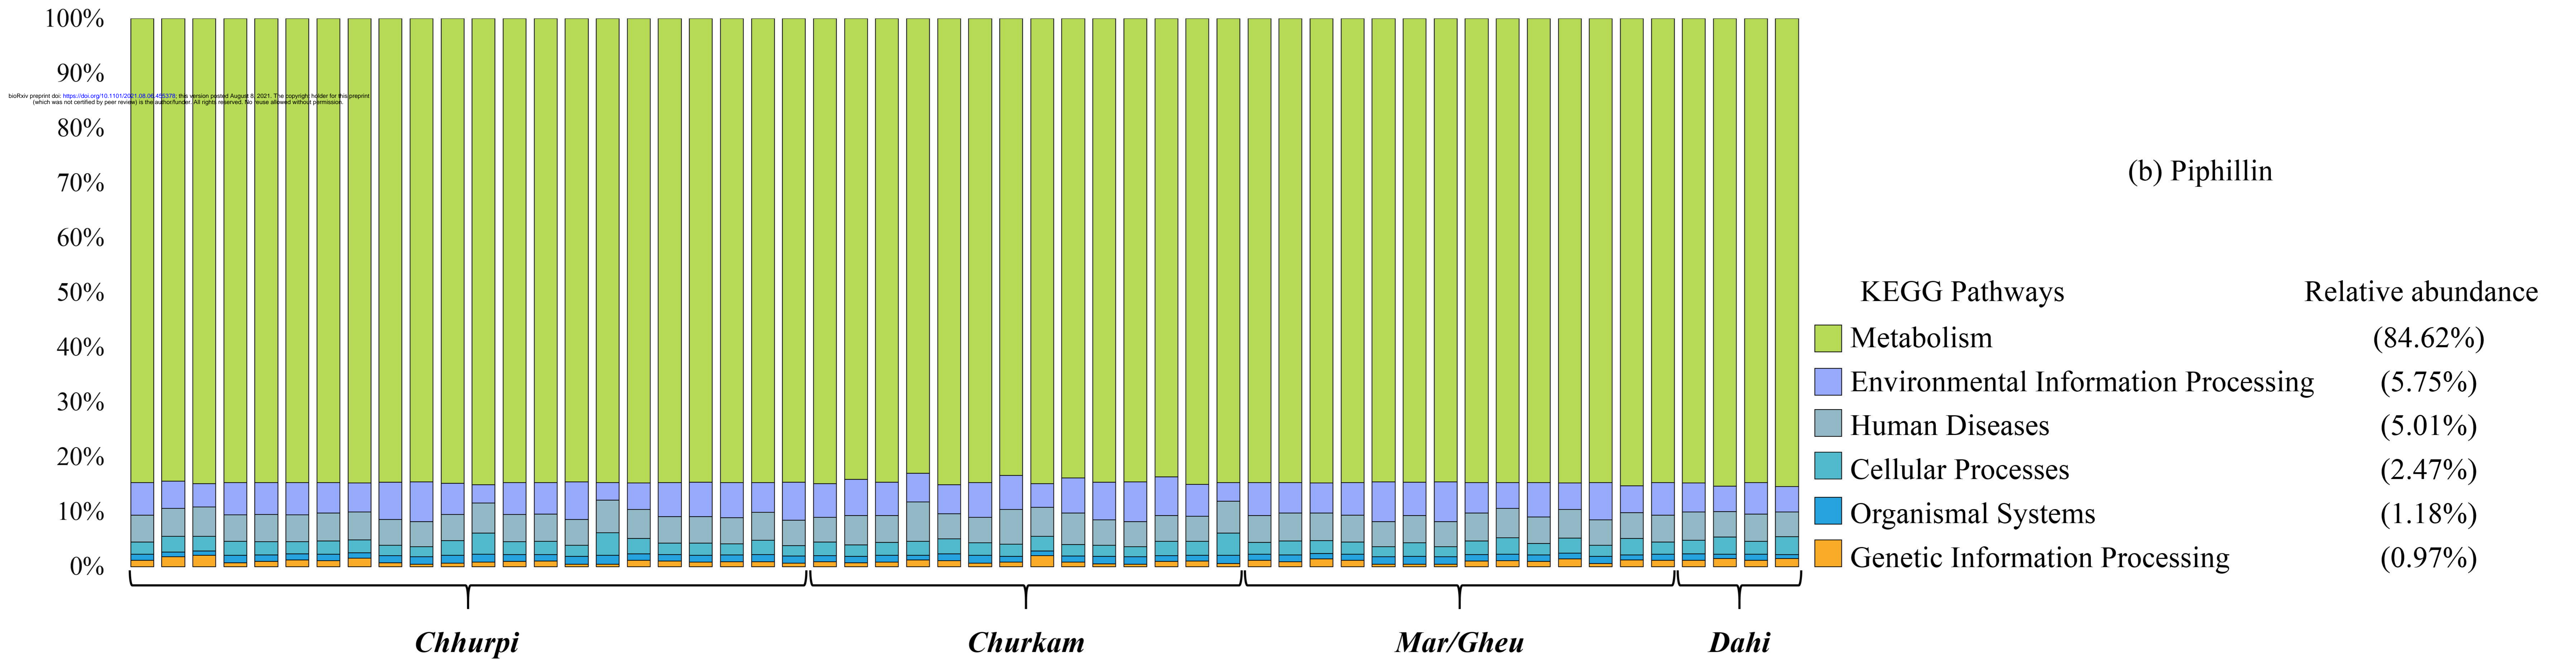

(a)

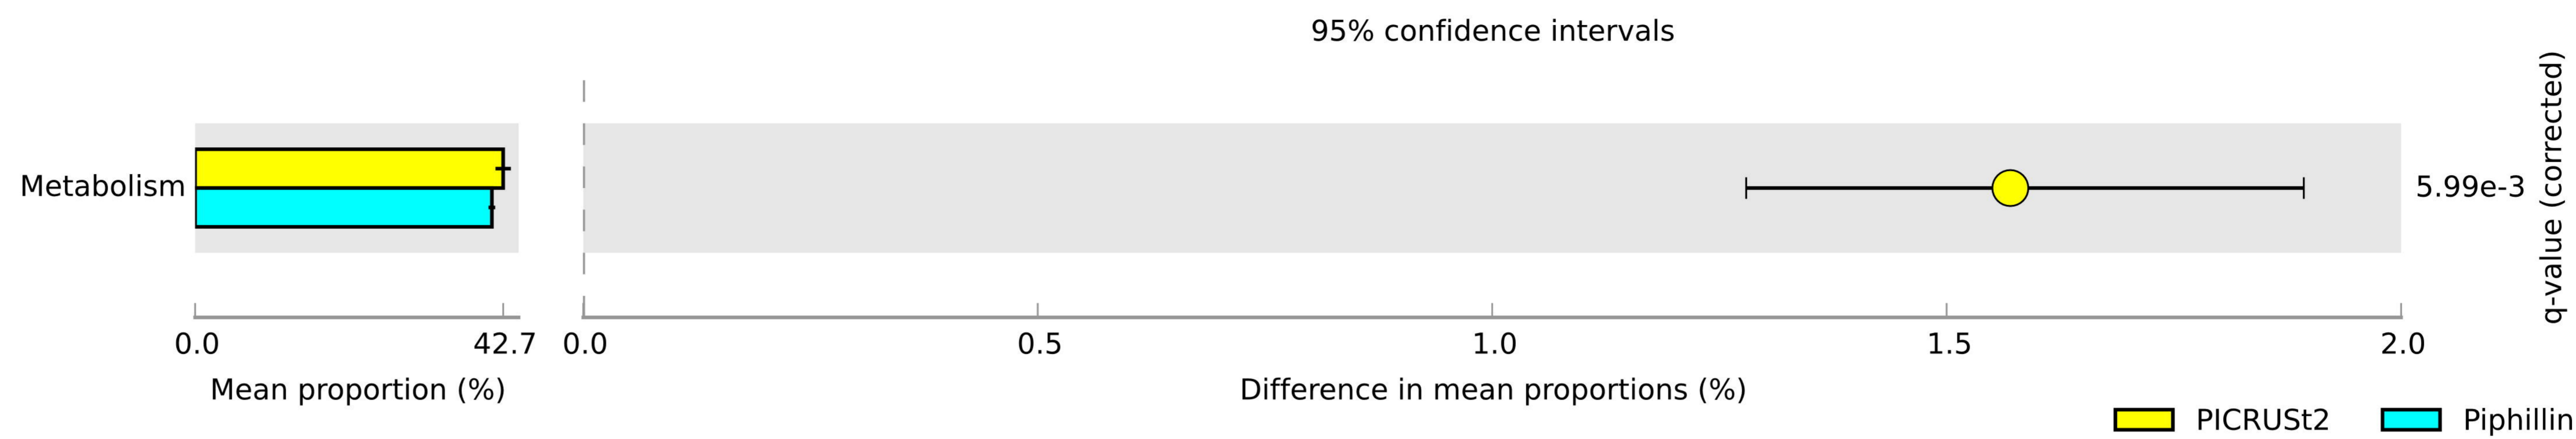

bioRxiv preprint doi: <https://doi.org/10.1101/2021.08.06.455376>; this version posted August 8, 2021. The copyright holder for this preprint (which was not certified by peer review) is the author/funder. All rights reserved. No reuse allowed without permission.

(b)

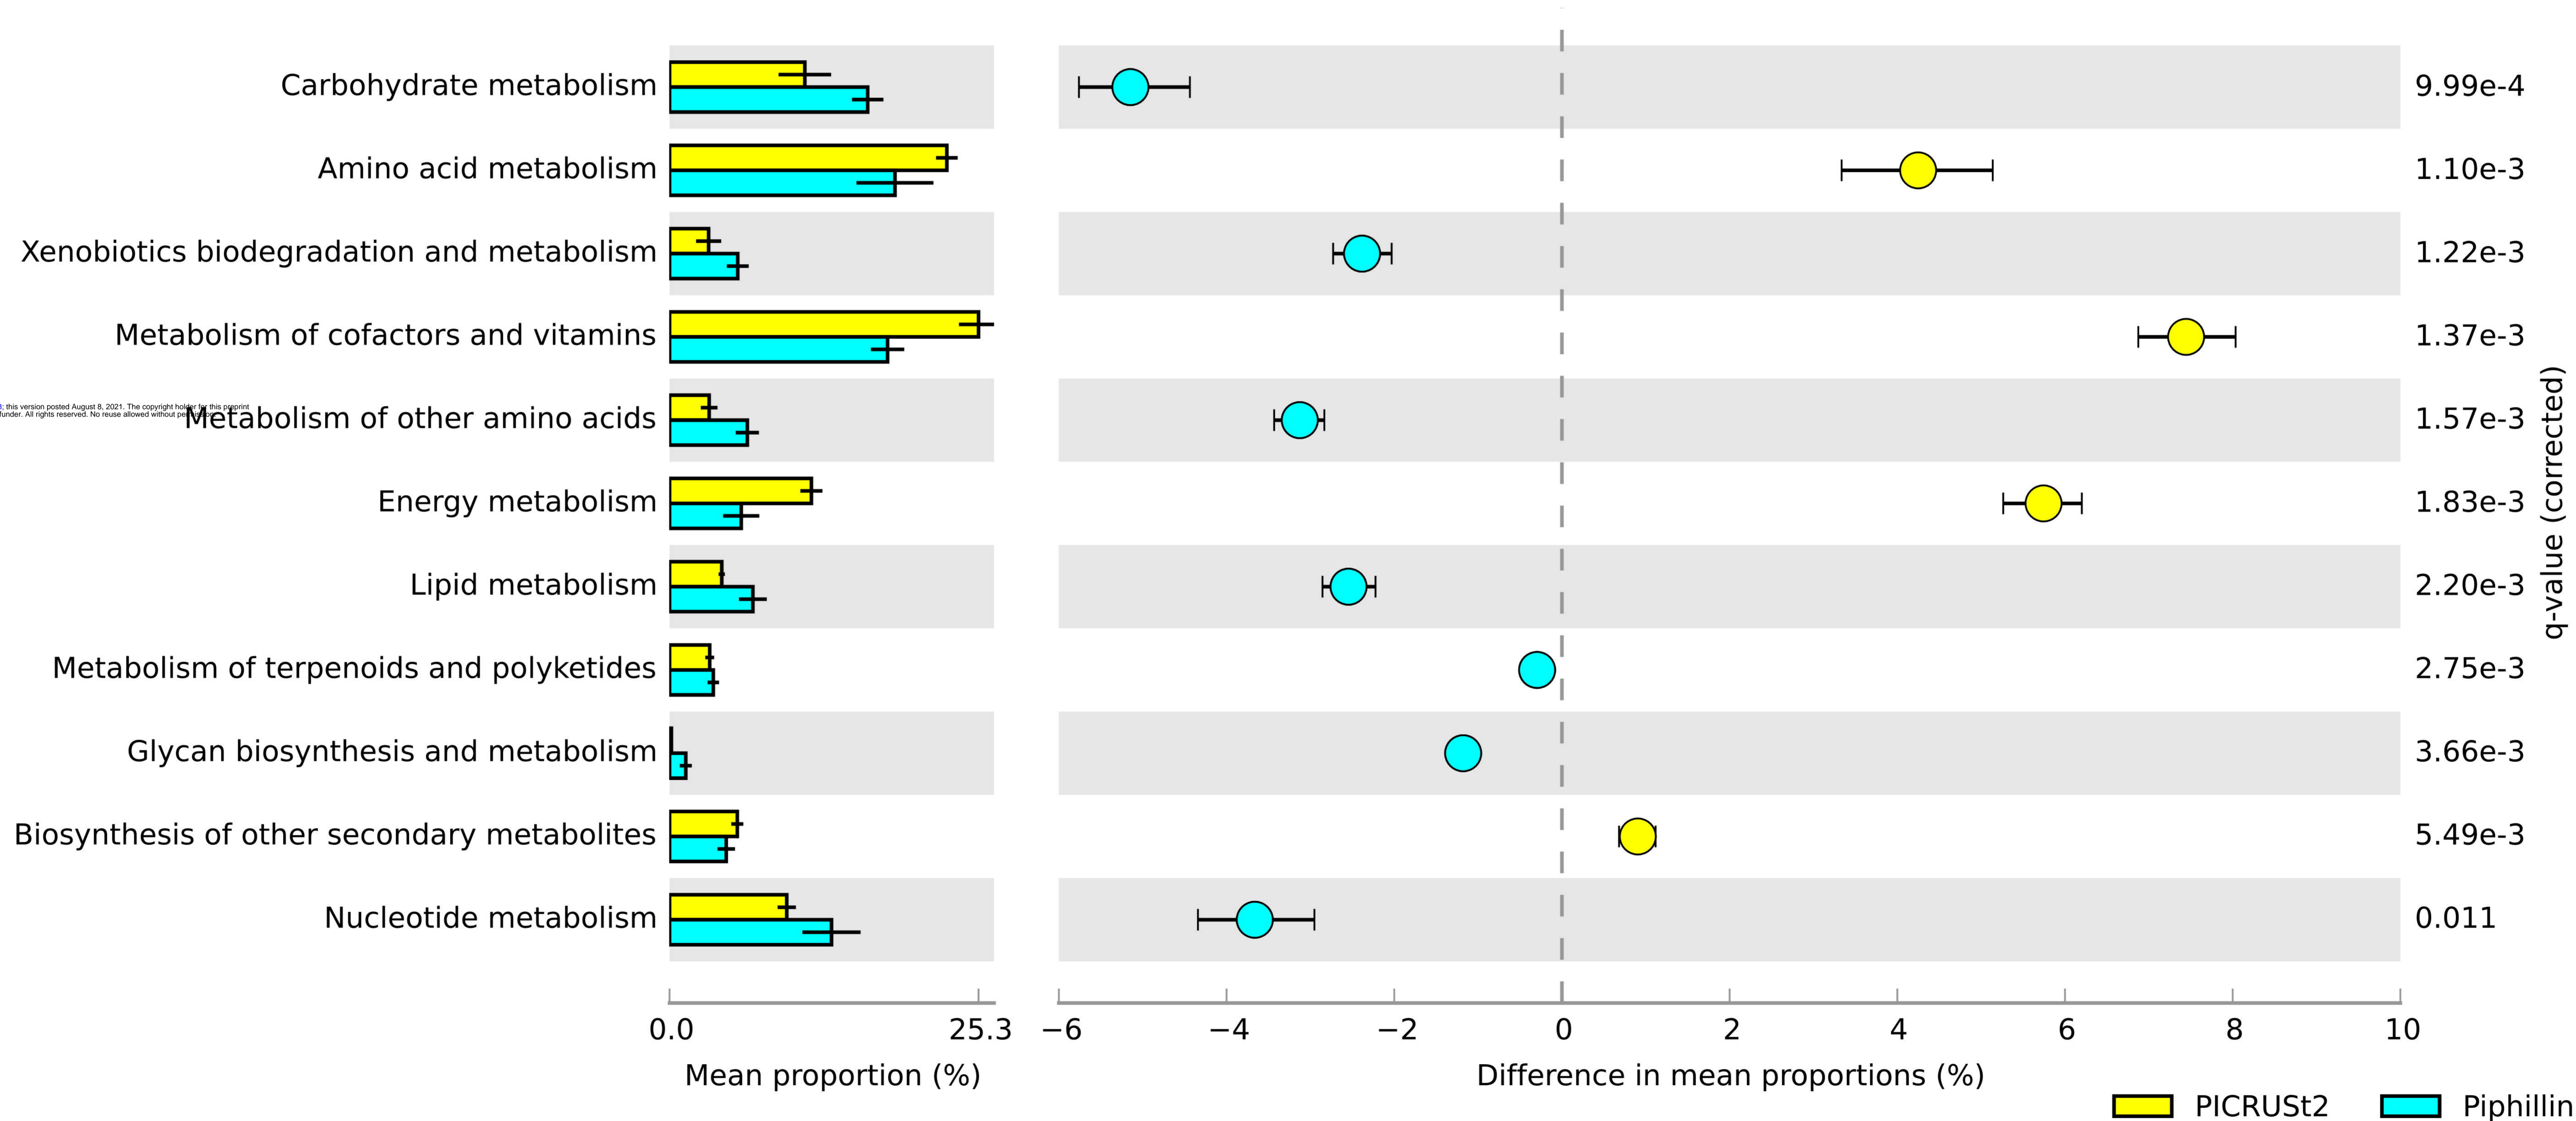

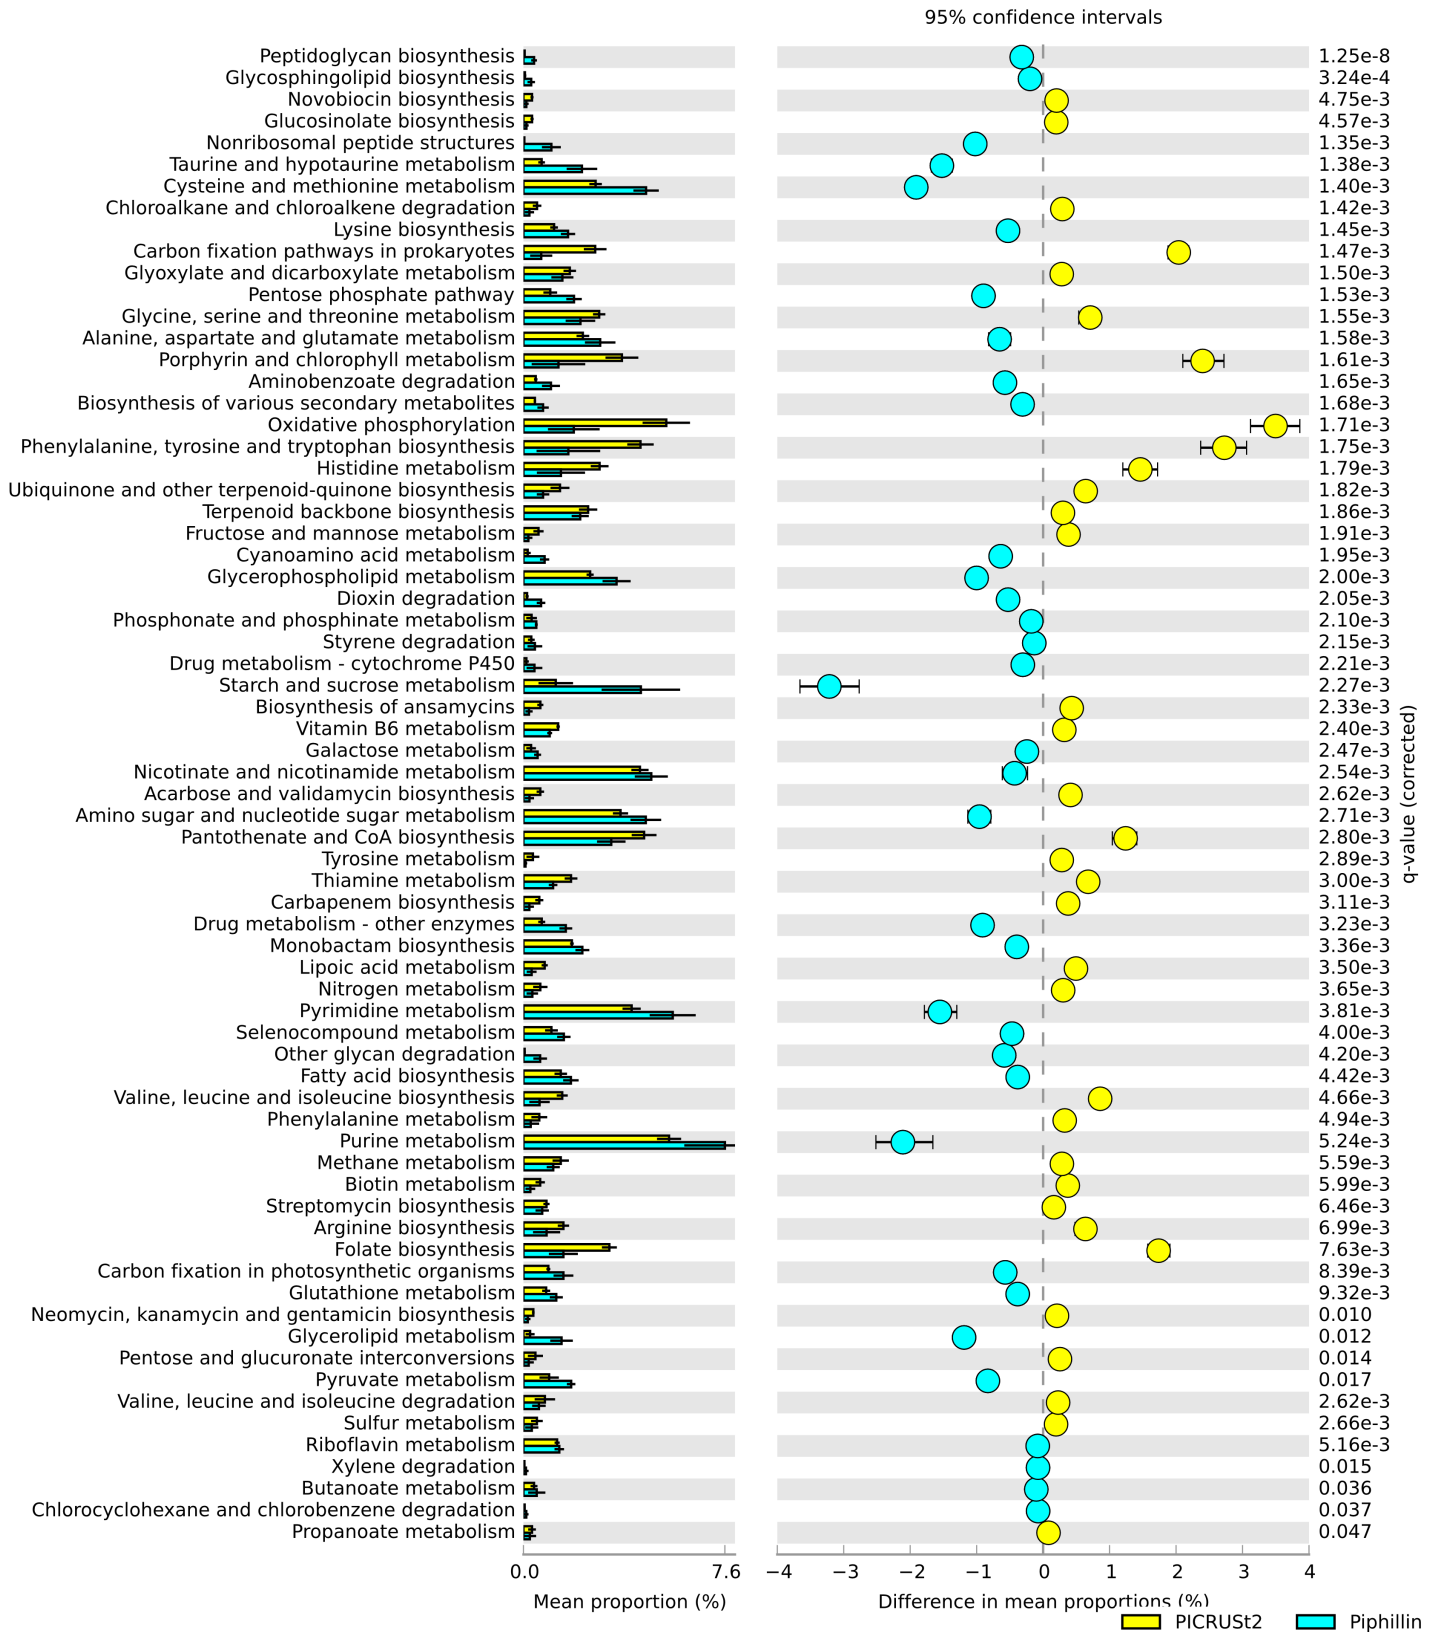

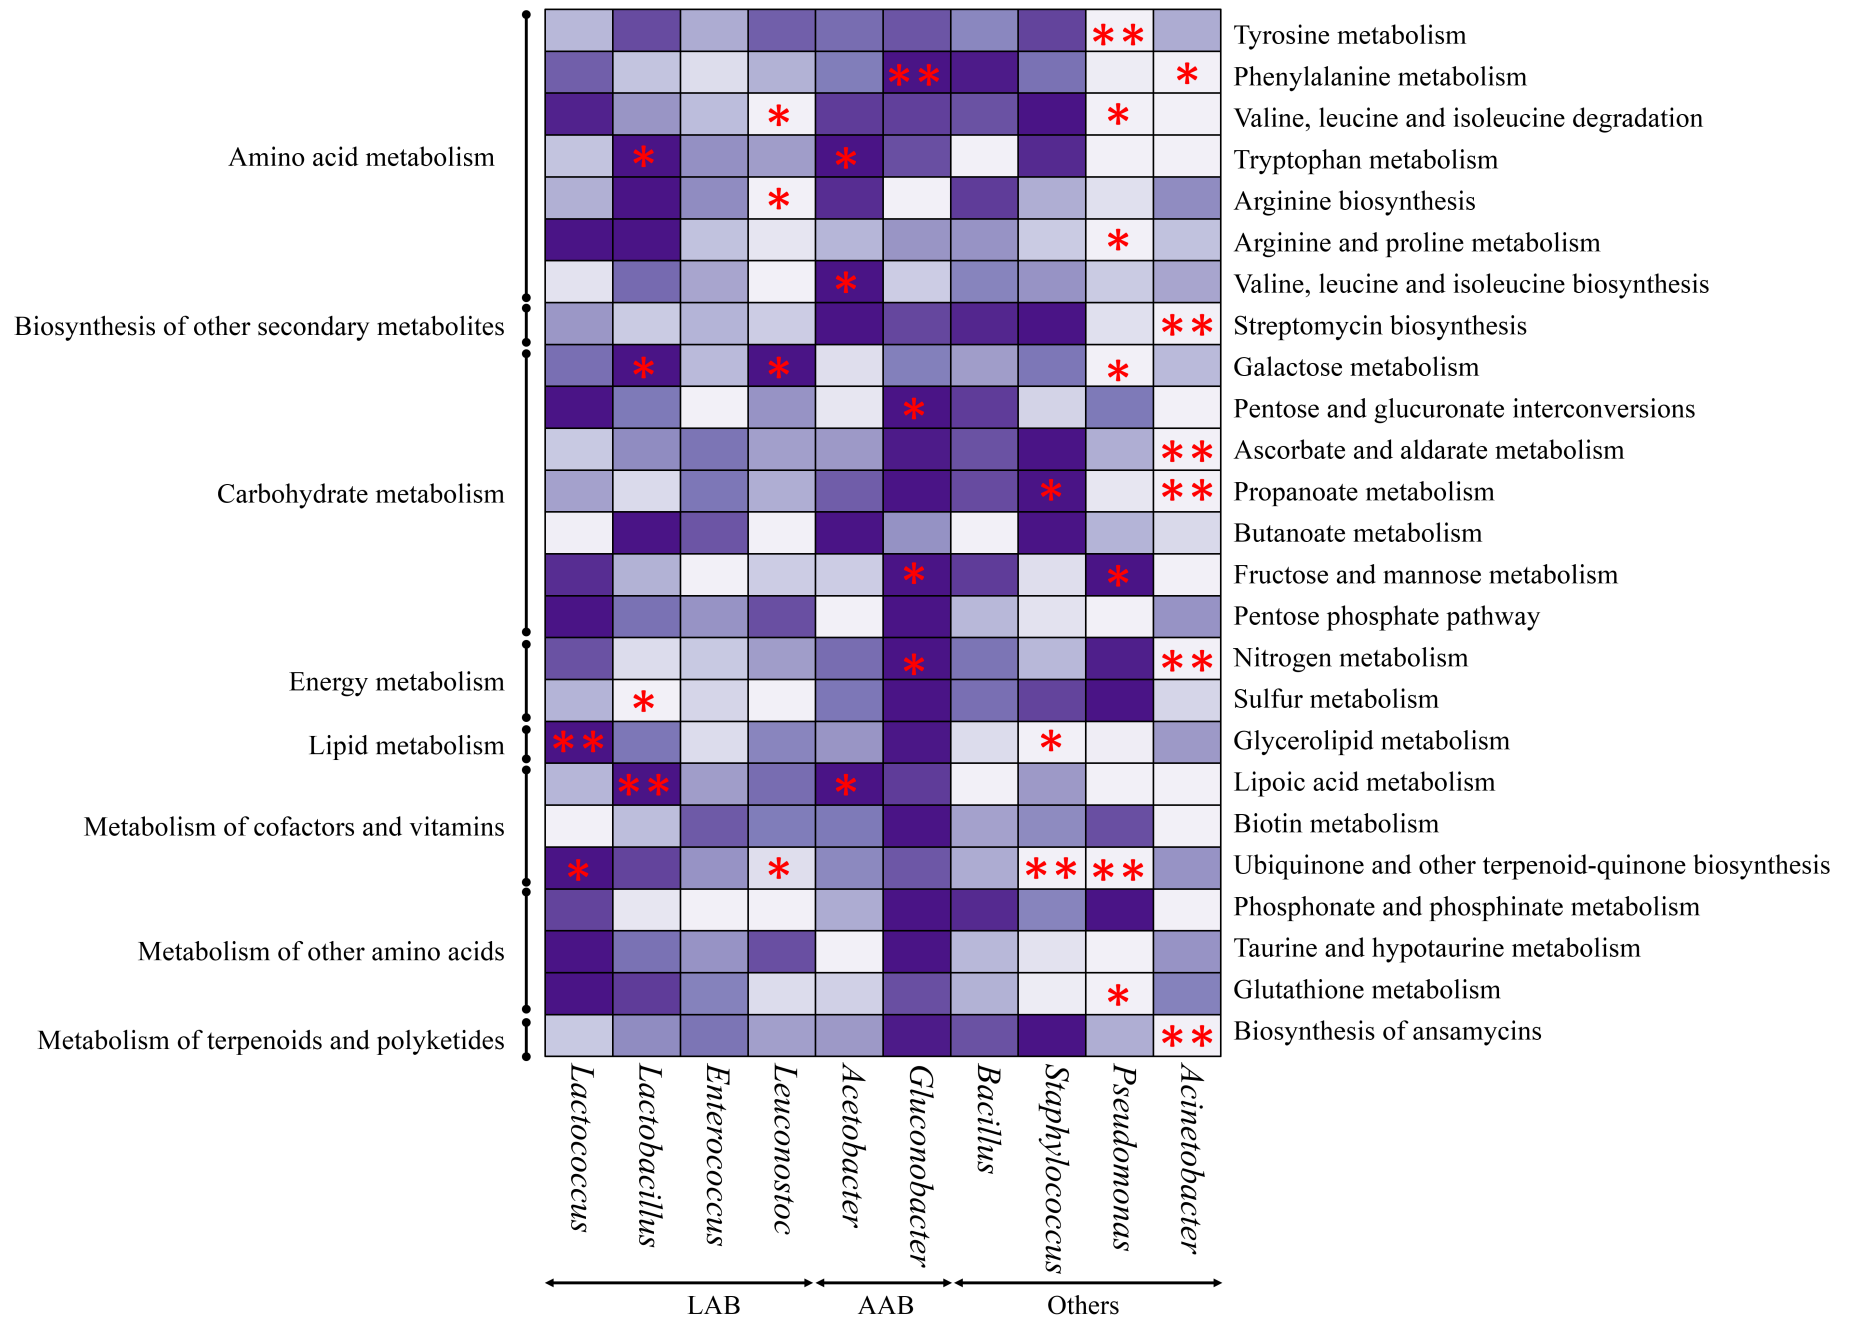

Source: https://www.biorxiv.org/content/10.1101/2021.08.06.455378v1.full.pdf
